# Supplementary material for: Antihypertensive medications are associated with the risk of kidney and bladder cancer: a systematic review and meta-analysis
Source: publisher site journal article supplement (doi:10.18632/aging.102699), 2020-01-22
Supplement: Supplementary file [file aging-v12i2-102699-supplementary-material-SD1.pdf]

**SUPPLEMENTARY FIGURES**

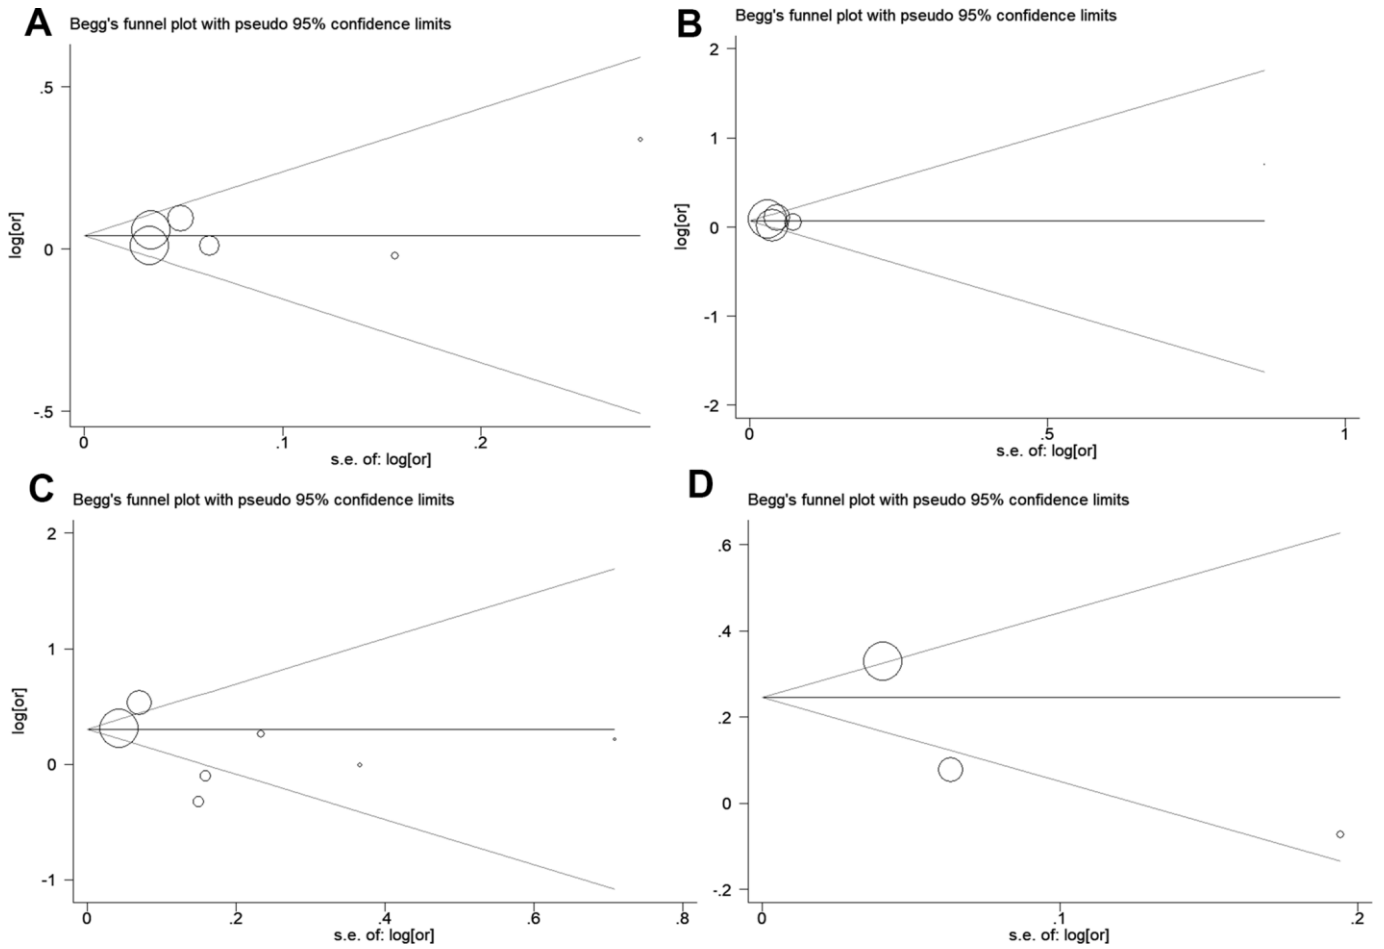

**Supplementary Figure 1. Begg's funnel plot of association between using each class of antihypertensive medications and bladder cancer risk: (A) ACEI and bladder cancer risk; (B) ARB and bladder cancer risk; (C) CCB and bladder cancer risk; (D) diuretics and bladder cancer risk.**

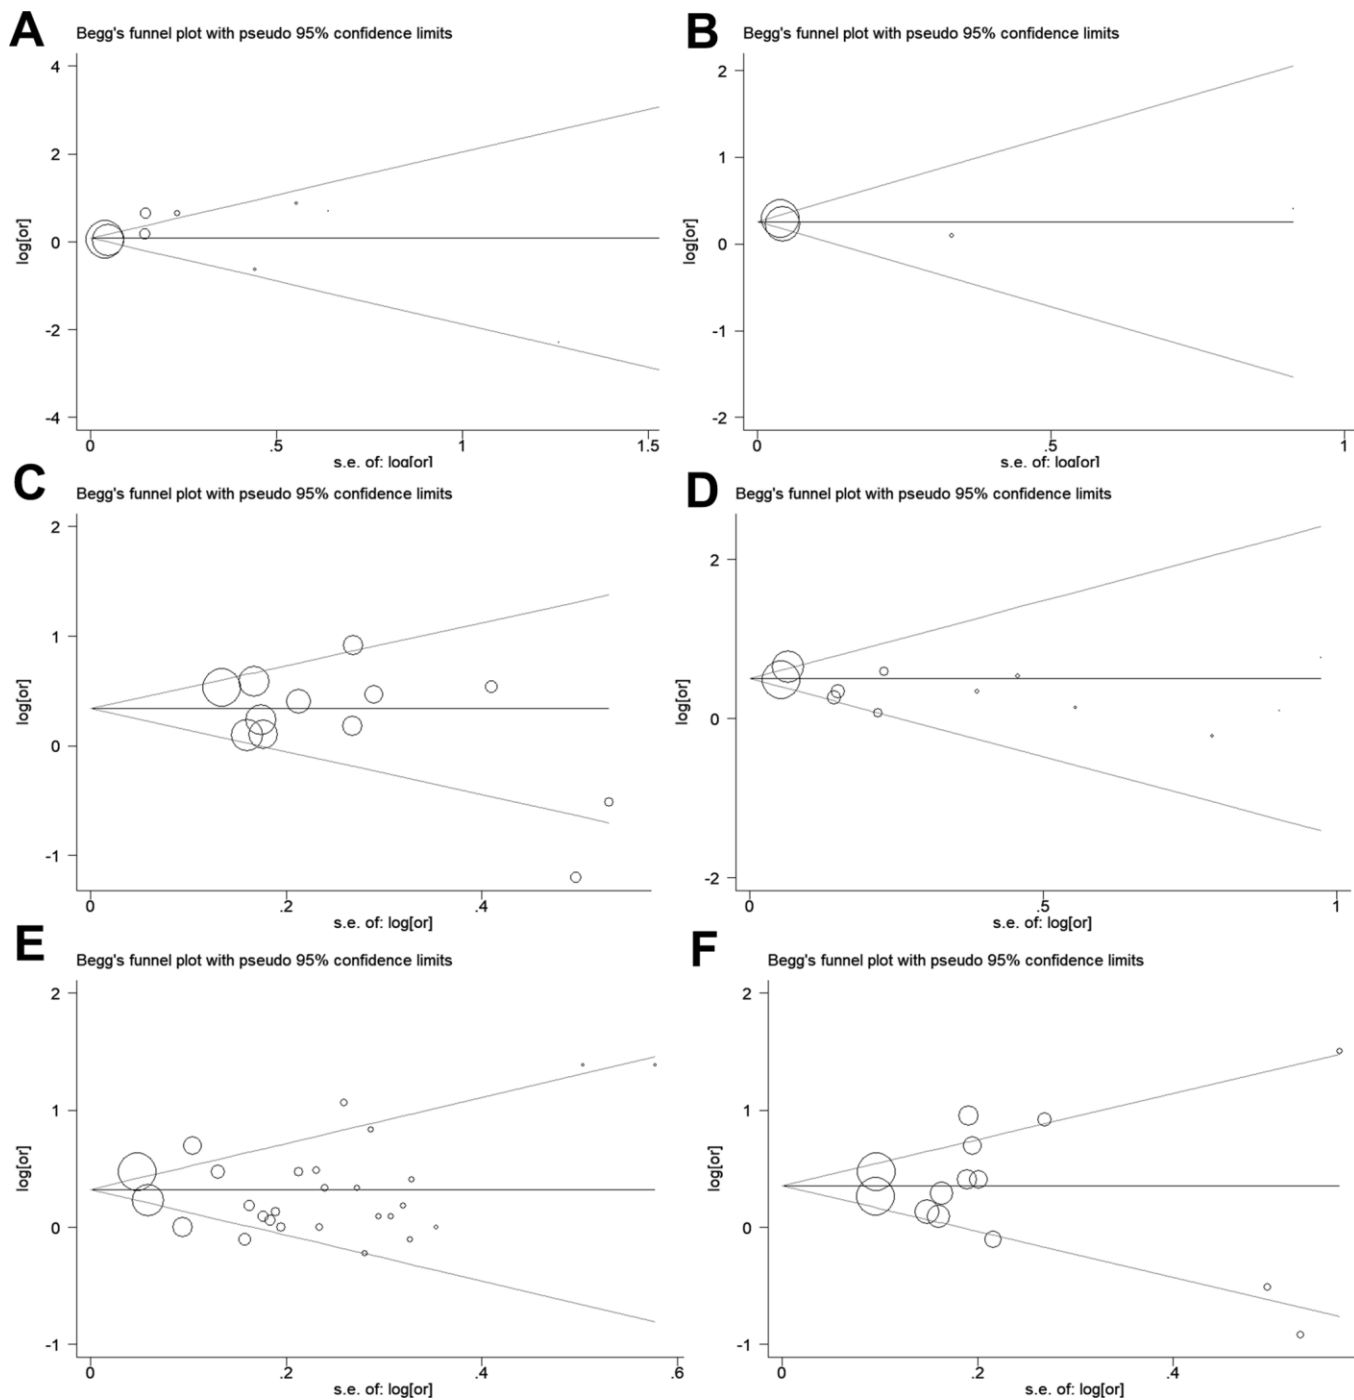

**Supplementary Figure 2. Begg's funnel plot of association between using each class of antihypertensive medications and kidney cancer risk: (A) ACEI and kidney cancer risk; (B) ARB and kidney cancer risk; (C) BB and kidney cancer risk; (D) CCB and kidney cancer risk; (E) diuretics and kidney cancer risk; (F) any antihypertensive medications and kidney cancer risk.**

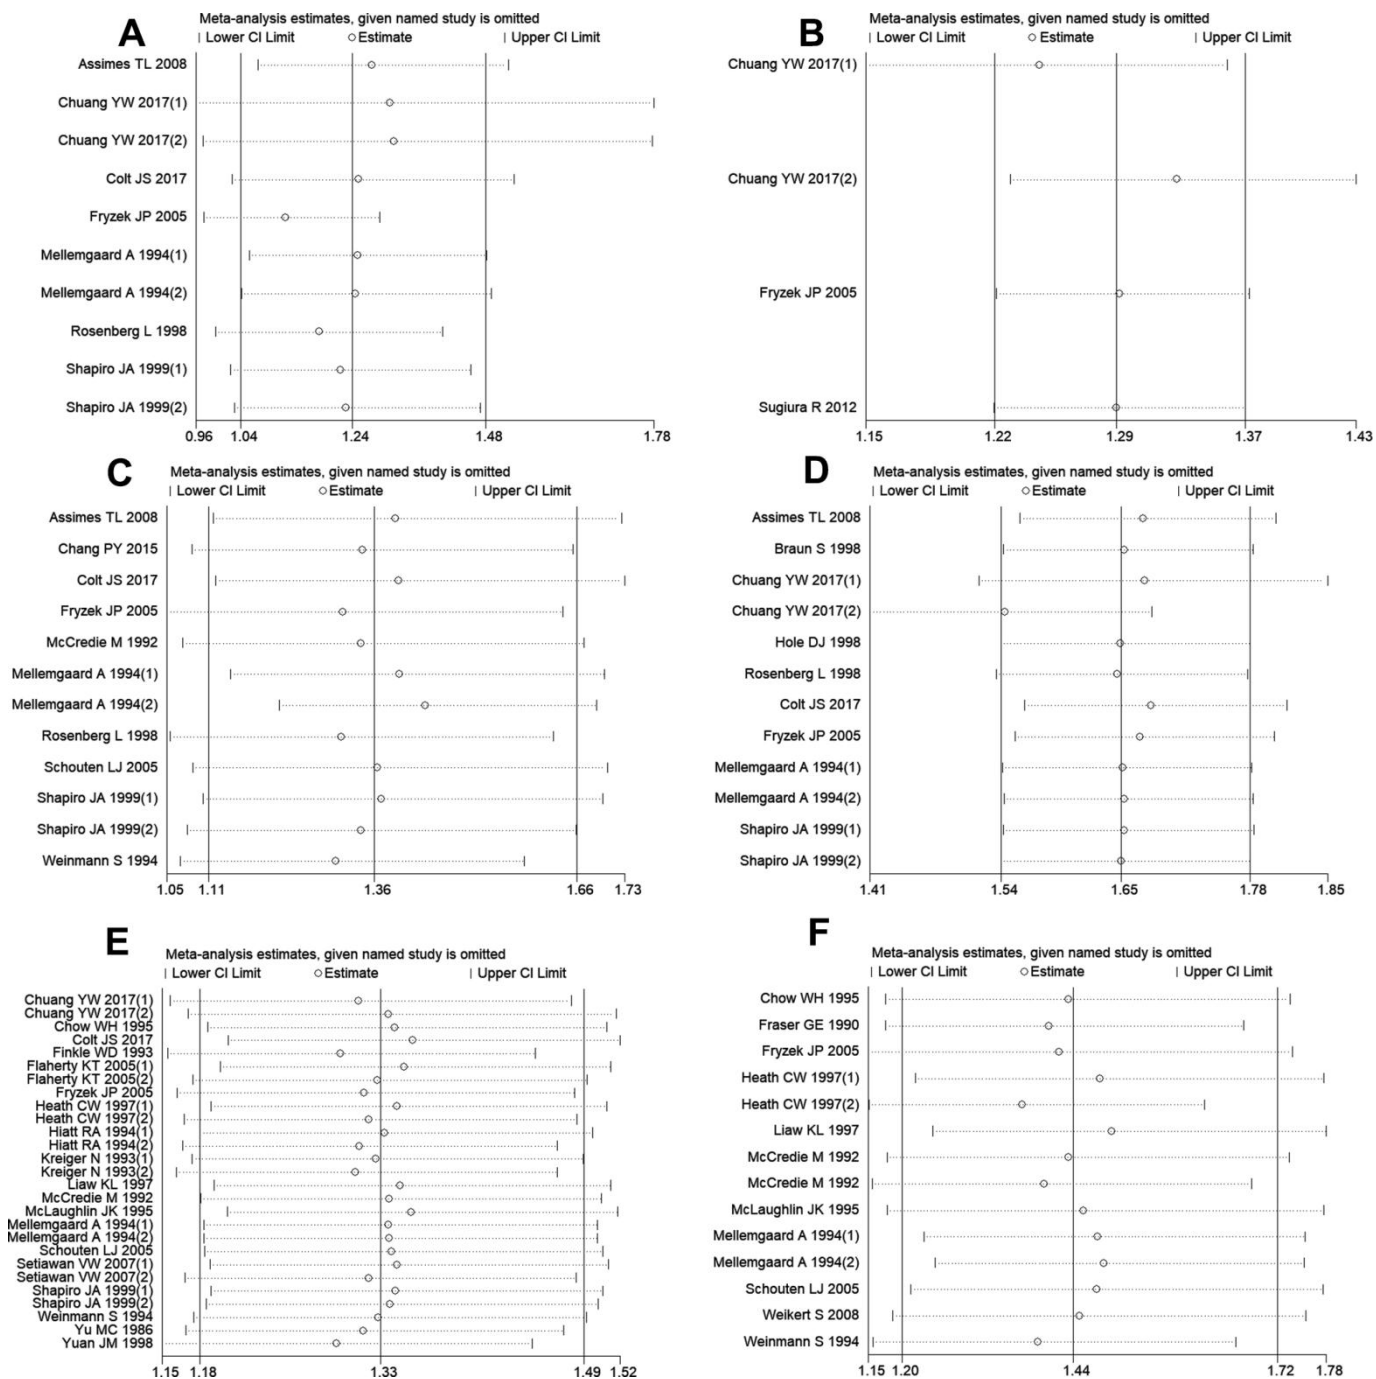

**Supplementary Figure 3. Sensitivity analysis of association between using each class of antihypertensive medications and kidney cancer risk: (A) ACEI and kidney cancer risk; (B) ARB and kidney cancer risk; (C) BB and kidney cancer risk; (D) CCB and kidney cancer risk; (E) diuretics and kidney cancer risk; (F) any antihypertensive medications and kidney cancer risk.**
